# Supplementary material
Source: PubMed Central journal article supplement (PMC6535540)
Supplement: AAC.00004-19-s0001.pdf [file AAC.00004-19-s0001.pdf]

1 Supplement to:

2

3 *In Vitro* and *In Vivo* Activities of Zinc Linolenate, a Selective Antibacterial Agent against

4 *Helicobacter pylori*

5

6

7

8

9

10 Yanqiang Huang<sup>a</sup>, Xudong Hang<sup>a</sup>, Xueqing Jiang<sup>a</sup>, Liping Zeng<sup>a</sup>, Jia Jia<sup>a</sup>, Yong Xie<sup>b</sup>, Fei Li<sup>c</sup>,

11 Hongkai Bi<sup>a,#</sup>

12

13 <sup>a</sup>Department of Pathogen Biology, Jiangsu Key Laboratory of Pathogen Biology, Nanjing

14 Medical University, Nanjing, Jiangsu 211166, China

15 <sup>b</sup>Department of Gastroenterology, the First Affiliated Hospital of Nanchang University,

16 Nanchang, Jiangxi 330006, China.

17 <sup>c</sup>Department of Medicinal Chemistry, School of Pharmacy, Nanjing Medical University,

18 Nanjing, Jiangsu 211166, China.

19

20

21 **Table S1.** Broth microdilution MIC of metal complex of unsaturated fatty acid for *H. pylori*  
 22 strains. (MIC: µg/ml)

| Strain | Drug sensitivity | BiLla | FeLla | ZnOa | ZnSa | ZnPa | ZnMa |
|--------|------------------|-------|-------|------|------|------|------|
| HP2665 | S                | 128   | >128  | >128 | >128 | >128 | >128 |
| NSH57  | S                | 64    | >128  | >128 | >128 | >128 | >128 |
| G27    | S                | 64    | >128  | >128 | >128 | >128 | >128 |
| HP159  | L, C, M (R)      | 128   | >128  | >128 | >128 | >128 | >128 |
| HP163  | L, M (R)         | 64    | >128  | >128 | >128 | >128 | >128 |
| HP160  | M (R)            | 64    | 128   | >128 | >128 | >128 | >128 |
| HP161  | C (R)            | 128   | >128  | >128 | >128 | >128 | >128 |
| HP162  | L (R)            | 64    | 128   | >128 | >128 | >128 | >128 |

23 Abbreviations: L, levofloxacin; C, clarithromycin; M, metronidazole; S, Drug sensitive; R,  
 24 Drug resistance; BiLla, bismush linolenate; FeLla, iron linolenate; ZnOa, zinc oleate; ZnSa,  
 25 zinc stearate; ZnPa, zinc palmitate; ZnMa, zinc myristate.

26

**Table S2.** The toxicity of ZnLla after oral gavage.

| Groups                                | ALT<br>(U/L)     | AST<br>(U/L)       | BUN<br>(mmol/L)  | CREA<br>( $\mu$ mol/L) |
|---------------------------------------|------------------|--------------------|------------------|------------------------|
| Infected (PBS)                        | 22.00 $\pm$ 4.36 | 110.00 $\pm$ 14.73 | 13.90 $\pm$ 3.72 | 16.67 $\pm$ 1.15       |
| Infected (OPZ+AC)                     | 34.33 $\pm$ 3.43 | 220.00 $\pm$ 18.40 | 8.77 $\pm$ 1.23  | 17.00 $\pm$ 1.00       |
| Infected (OPZ+ZnLla)                  | 19.67 $\pm$ 1.53 | 117.00 $\pm$ 12.61 | 10.27 $\pm$ 0.32 | 16.33 $\pm$ 0.58       |
| Infected (ZnLla)                      | 20.00 $\pm$ 4.12 | 182.33 $\pm$ 14.74 | 14.97 $\pm$ 3.28 | 18.33 $\pm$ 1.06       |
| Uninfected (10-fold dosage of ZnLla ) | 23.33 $\pm$ 0.58 | 138.33 $\pm$ 13.18 | 11.90 $\pm$ 0.79 | 15.00 $\pm$ 2.00       |
| Uninfected (PBS)                      | 29.00 $\pm$ 6.93 | 231.00 $\pm$ 17.25 | 13.13 $\pm$ 1.42 | 18.33 $\pm$ 1.69       |

27 Abbreviations: ALA, Alanine aminotransferase; AST, Aspartate aminotransferase; BUN,  
28 urea nitrogen; CREA, creatinine.

29

30

31

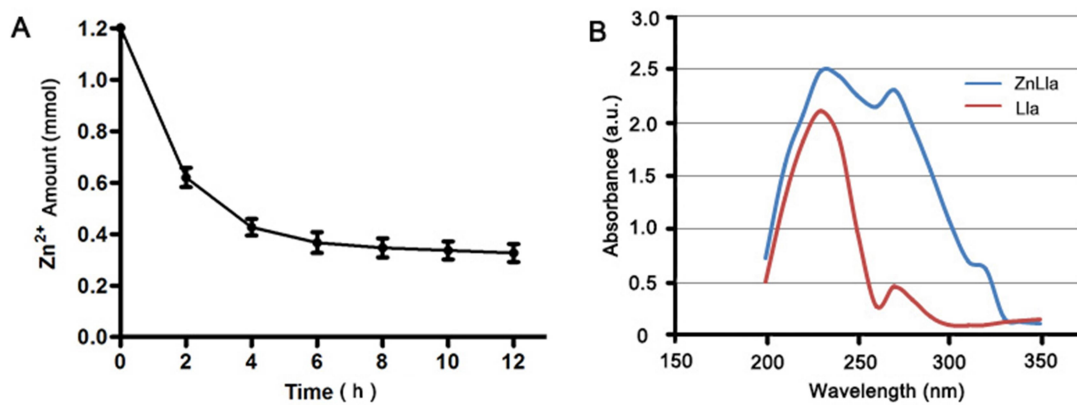

32

33 **Figure S1.** A. The amount change of Zn<sup>2+</sup> during the reaction process of ZnLla. B. UV-Vis  
34 spectrum of ZnLla (blue line) and Lla (red line).

35

36

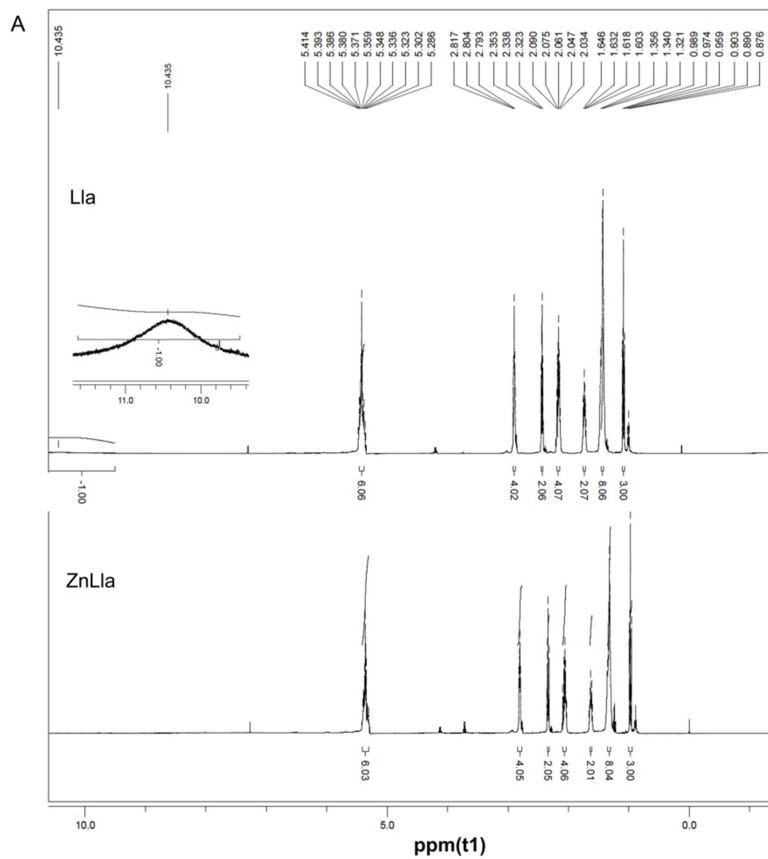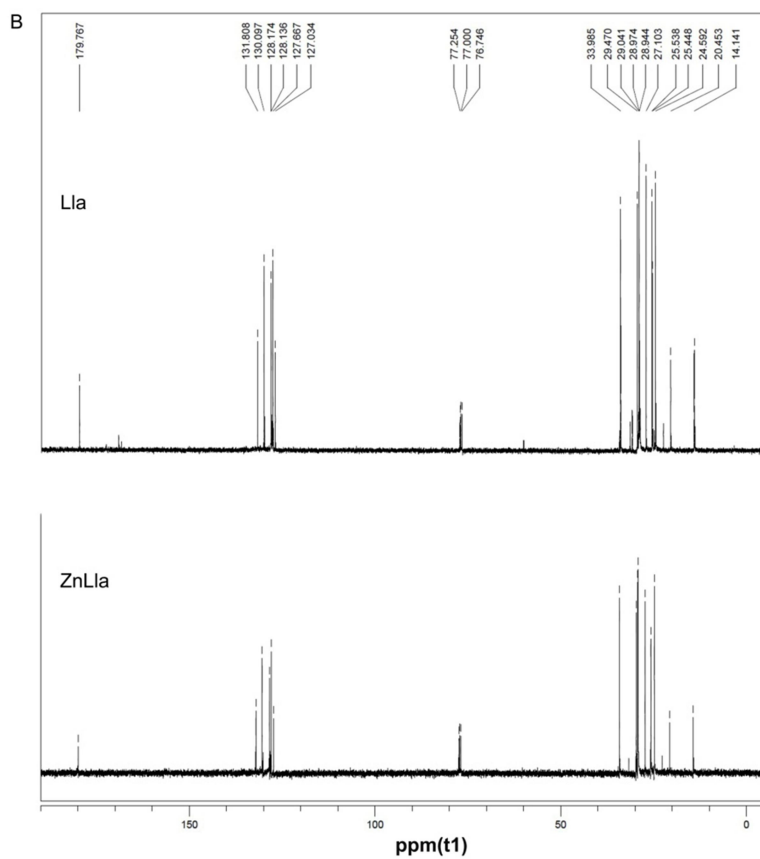

39 **Figure S2.** A.  $^1\text{H}$  NMR spectrum of Lla and ZnLla in  $\text{CDCl}_3$  (500 MHz,  $\text{CDCl}_3$ ),  $\delta$ 5.40 ~  
 40 5.30 (m, 6H), 2.81 (t,  $J = 6.5$  Hz, 4H), 2.34 (t,  $J = 7.5$  Hz, 2H), 2.09 ~ 2.03 (m, 4H), 1.66 ~  
 41 1.60 (m, 2H), 1.36 ~ 1.32 (m, 8H), 0.97 (t,  $J = 7.5$  Hz, 3H); B.  $^{13}\text{C}$  NMR spectrum of Lla and  
 42 ZnLla in  $\text{CDCl}_3$  (125 MHz,  $\text{CDCl}_3$ ),  $\delta$ 179.9, 132.0, 130.3, 128.4, 127.9, 127.2, 34.2, 29.7,  
 43 29.2, 29.1, 27.3, 25.7, 24.8, 20.6, 14.3.

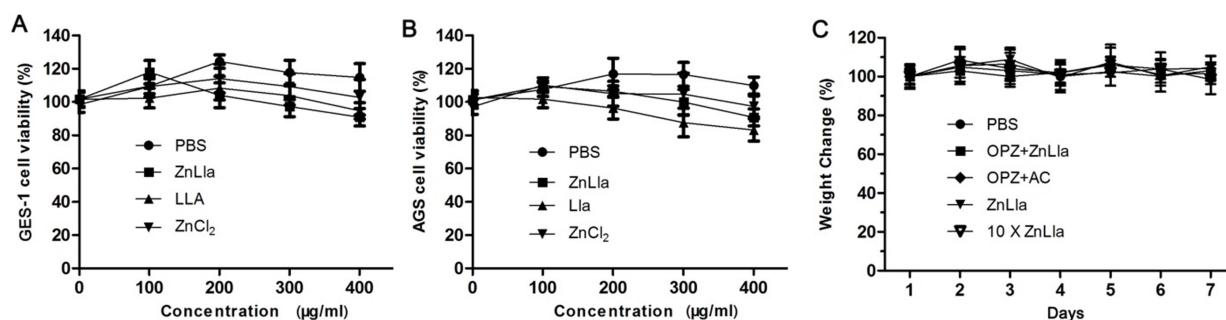

47 **Figure S3.** Cytotoxicity assays of ZnLla and effects on mouse weight. A. Cell viability test  
 48 on GES-1 cells. B. Cell viability test on AGS cells. C. The effects on mice weight change.

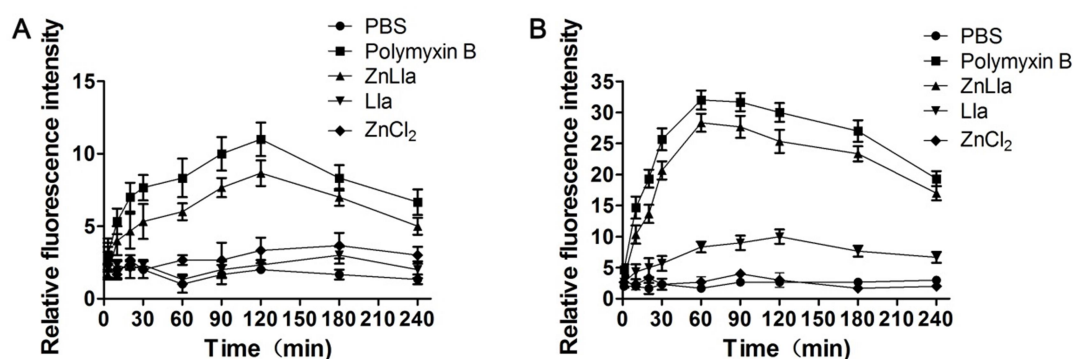

56 **Figure S4.** Uptake of N-phenyl naphthylamine (NPN) by *H. pylori* G27 cells after treatment of  
 57 PBS (negative control), 16 µg/ml (A) and 400 µg/ml (B) of polymyxin B (positive control),  
 58 ZnLla, Lla or ZnCl<sub>2</sub>.

60  
 61

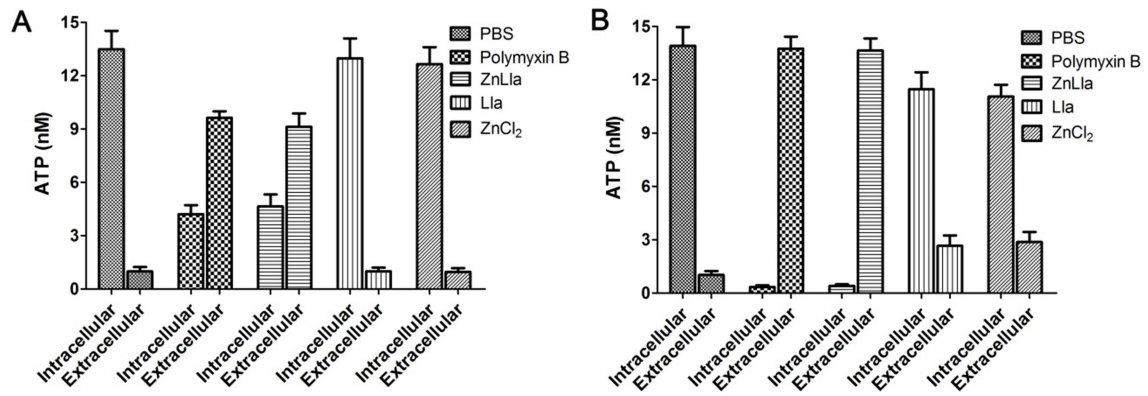

62

63

64

**Figure S5.** The release of ATP from *H. pylori* cells after treatment of PBS (negative control), 16 µg/ml (A) and 400 µg/ml (B) of polymyxin B (positive control), ZnLla, Lla or ZnCl<sub>2</sub>.

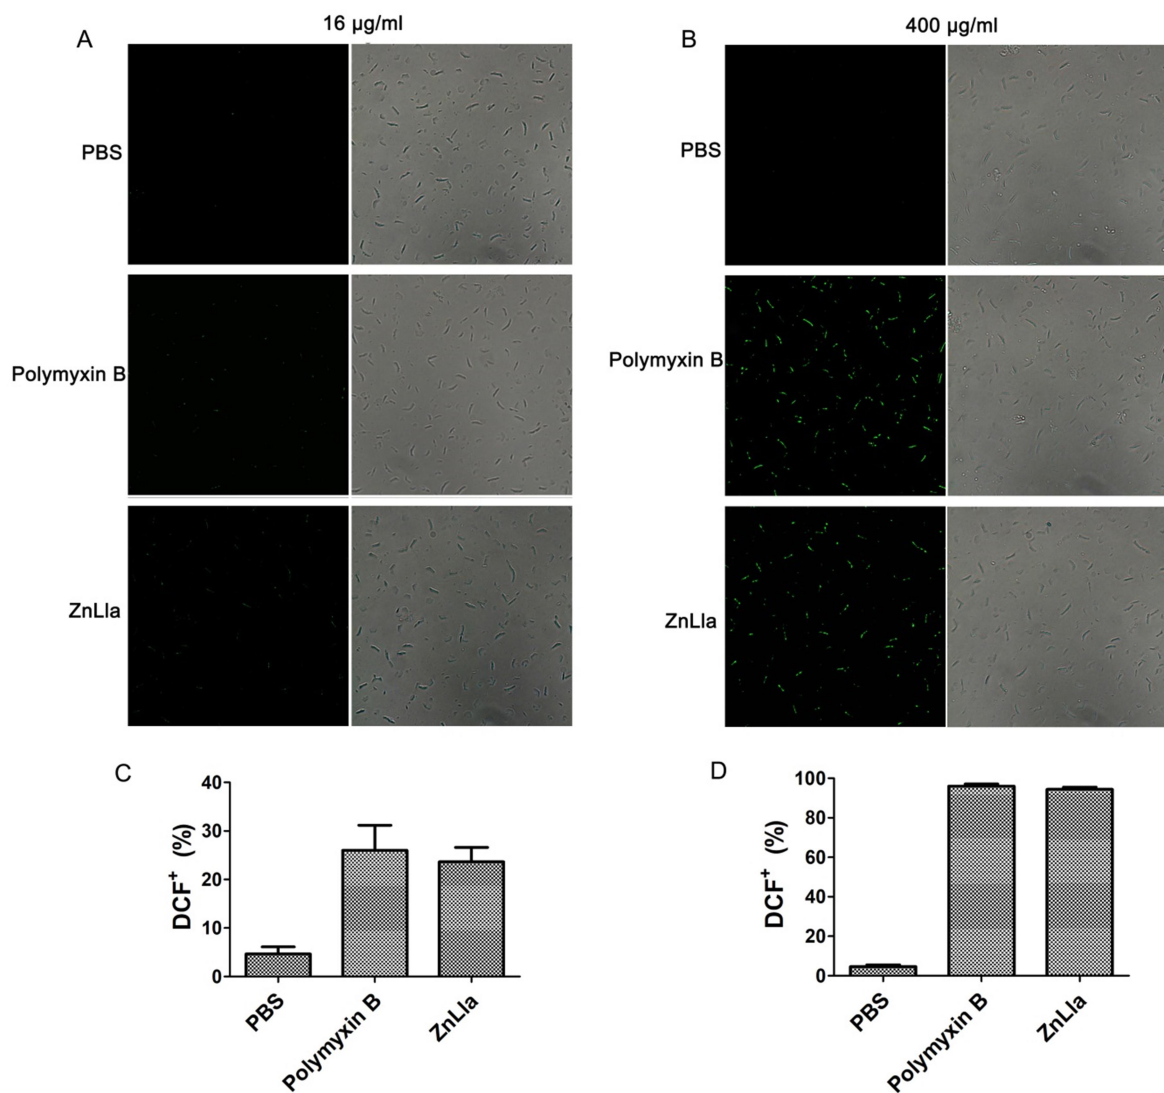

65

66

67

68

**Figure S6.** Fluorescence microscopic images (left) and bright field images (right) of DCF<sup>+</sup> labeled *H. pylori* stained with DCFDA after the incubation with PBS, 16 µg/ml (A) and 400 µg/ml (B) of polymyxin B or ZnLla. C and D. The ratios of DCF<sup>+</sup> cells incubated with each

69 treatment calculated by manually counting under a microscope. Data represent medians  $\pm$  SD  
 70 of three independent experiments.

71

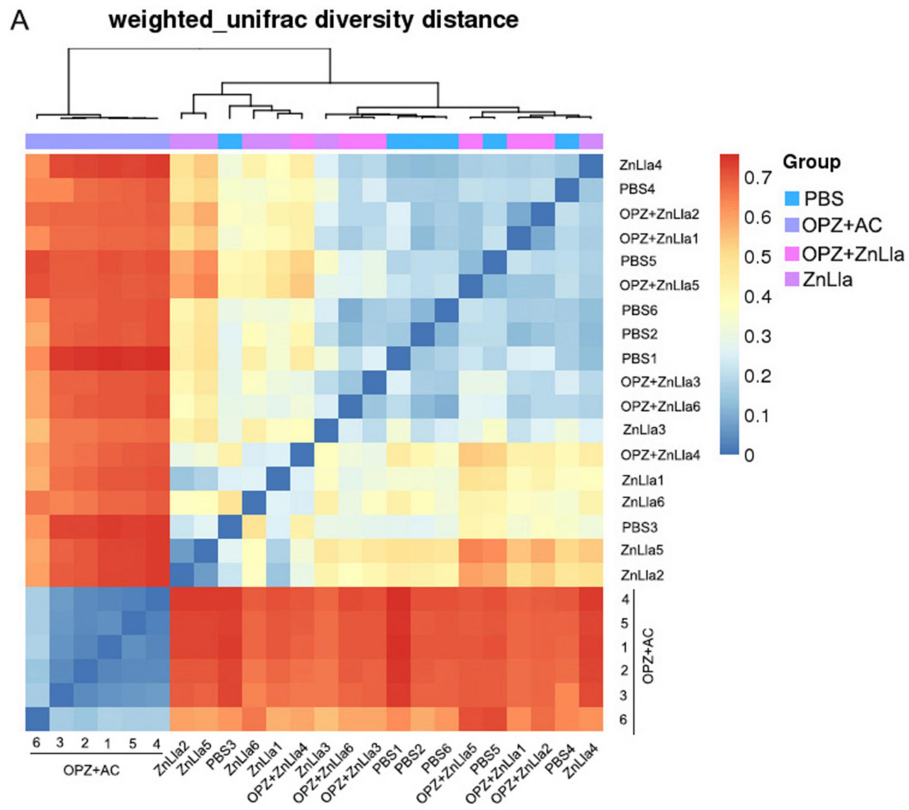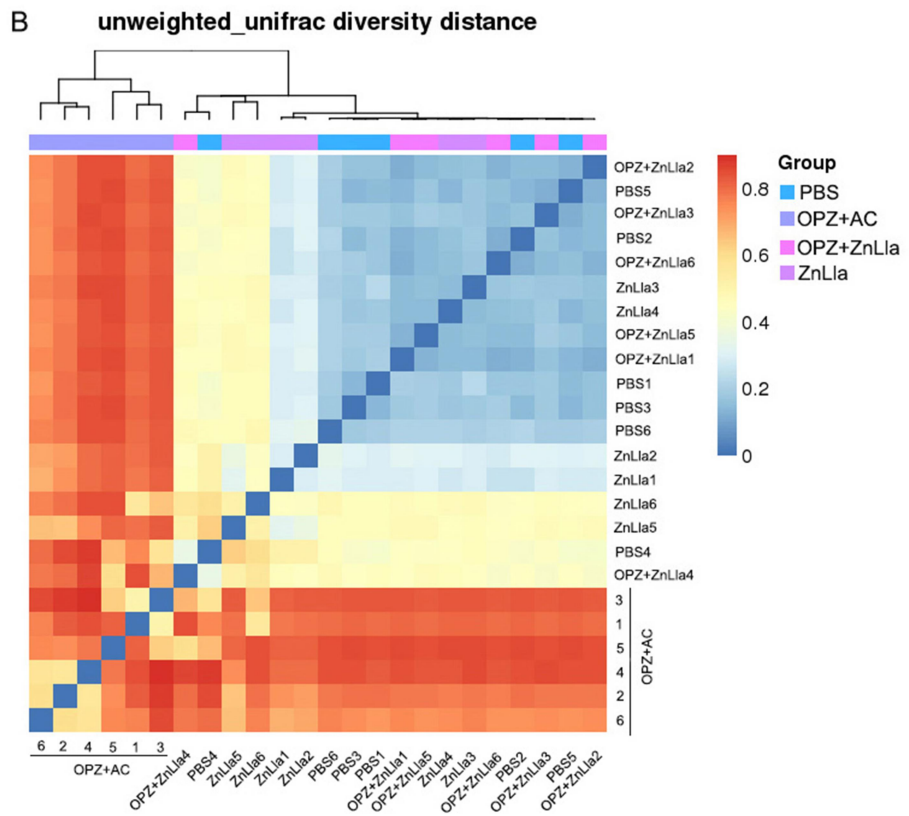

72

73 **Figure S7.** Beta diversity measurements of each sample receiving different treatments based  
 74 on weighted (A) and unweighted (B) Unifrac analysis.

75

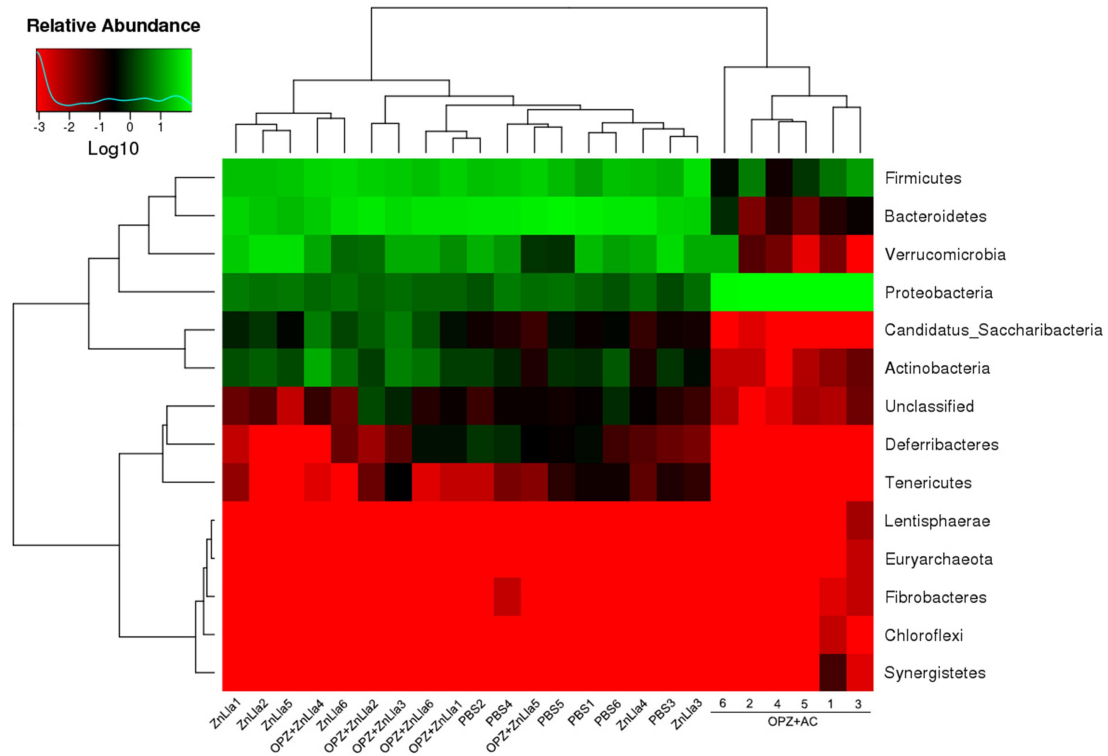

76

77 **Figure S8.** Log-scaled percentage heat map of Phylum-level in each sample receiving  
 78 different treatments identified from the sequenced data.

79

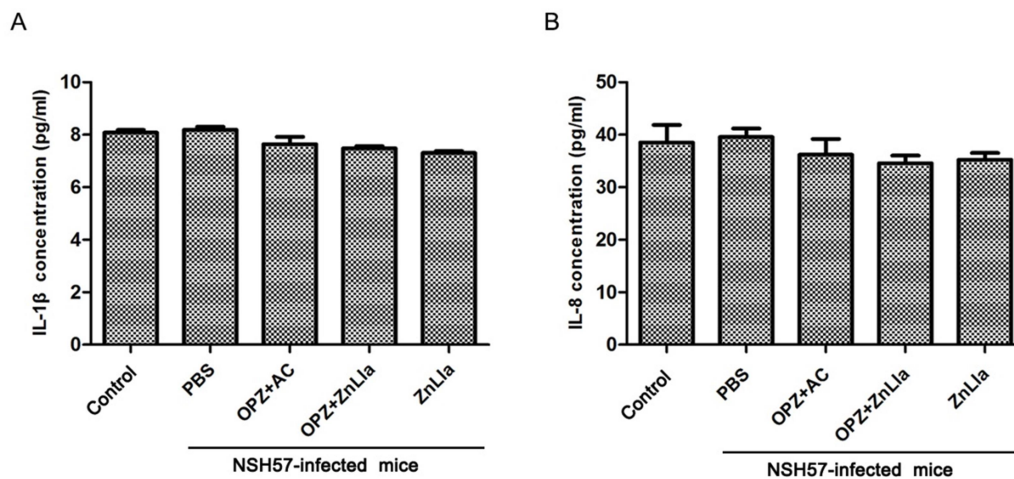

80

81 **Figure S9.** Proinflammatory cytokine production. Concentrations of serum IL-1 $\beta$  (A) and  
 82 IL-8 (B) levels were determined by ELISA kits from NSH57-infected mice (Normal) and  
 83 mice receiving different treatments.



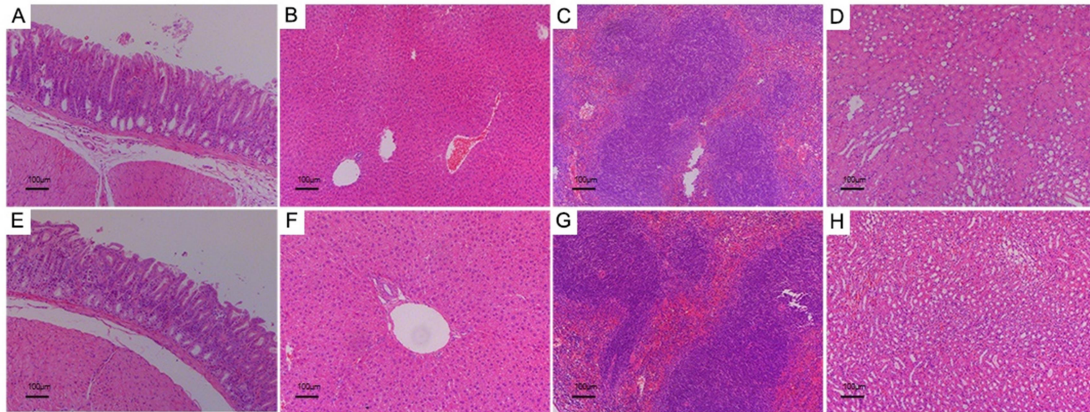

84

85 **Figure S10.** The H&E-stained stomach (A and E), liver (B and F), spleen (C and G) and  
86 kidney (D and H) from BHKS159-infected mice receiving 10-fold dosage of ZnL1a (scale  
87 bar = 100 μm). A-D, ×100; E-H, ×200.

88

89

90
